# Supplementary material
Source: publisher figshare collection journal article supplement (https://acs.figshare.com/ndownloader/files/25179065)
Supplement: Supplementary file 1 [file 25179065]

Supporting Information for

**Proinflammatory S100A9 Regulate Differentiation and  
Aggregation of Neural Stem Cells**

Yin Tian,<sup>‡,†</sup> Rui Cao,<sup>‡,†</sup> Bingchen Che,<sup>†</sup> Dan Sun,<sup>†</sup> Yong Tang,<sup>†</sup> Lin Jiang,  
<sup>†</sup> Qiao Bai,<sup>†</sup> Yonggang Liu,<sup>\*,†</sup> Ludmilla A. Morozova-Roche,<sup>\*,‡</sup> and Ce  
Zhang<sup>\*,†,#</sup>

<sup>†</sup>*Laboratory of Stem Cell and Tissue Engineering, Chongqing Medical  
University & Institute of Photonics and Photon-Technology, Northwest  
University, 1 Xue Fu Avenue, Shaanxi, 710127, Xi'an, China*

<sup>‡</sup>*Department of Medical Biochemistry and Biophysics, Umeå  
University, 90781, Umeå, Sweden*

<sup>#</sup>*Department of Pharmacy, Chongqing Three Gorges Medical College,  
404120, Chongqing, China*

Contains:

**Supplementary Movie descriptions of Video1-3  
Supplementary Figures S1-S5**

## Movie descriptions

**Supplementary Video 1:** NSC sphere formation during suspension (left) and adherent culture (right). Notably, the PDMS surface for adherent culture is treated with laminin for merely 20 min, which is considerably shorter than the standard protocol.

**Supplementary Video 2:** The NSC sphere formation process is highly dynamic, involving constant cell migrating in and out the entity.

**Supplementary Video 3:** NSC cells seems to group themselves based on the Dcx and Hes5 level during sphere formation and continuous culture. The cell with high Dcx level distribute only on the outer layer of the sphere, and the ones with high Hes5 stay in the core region.

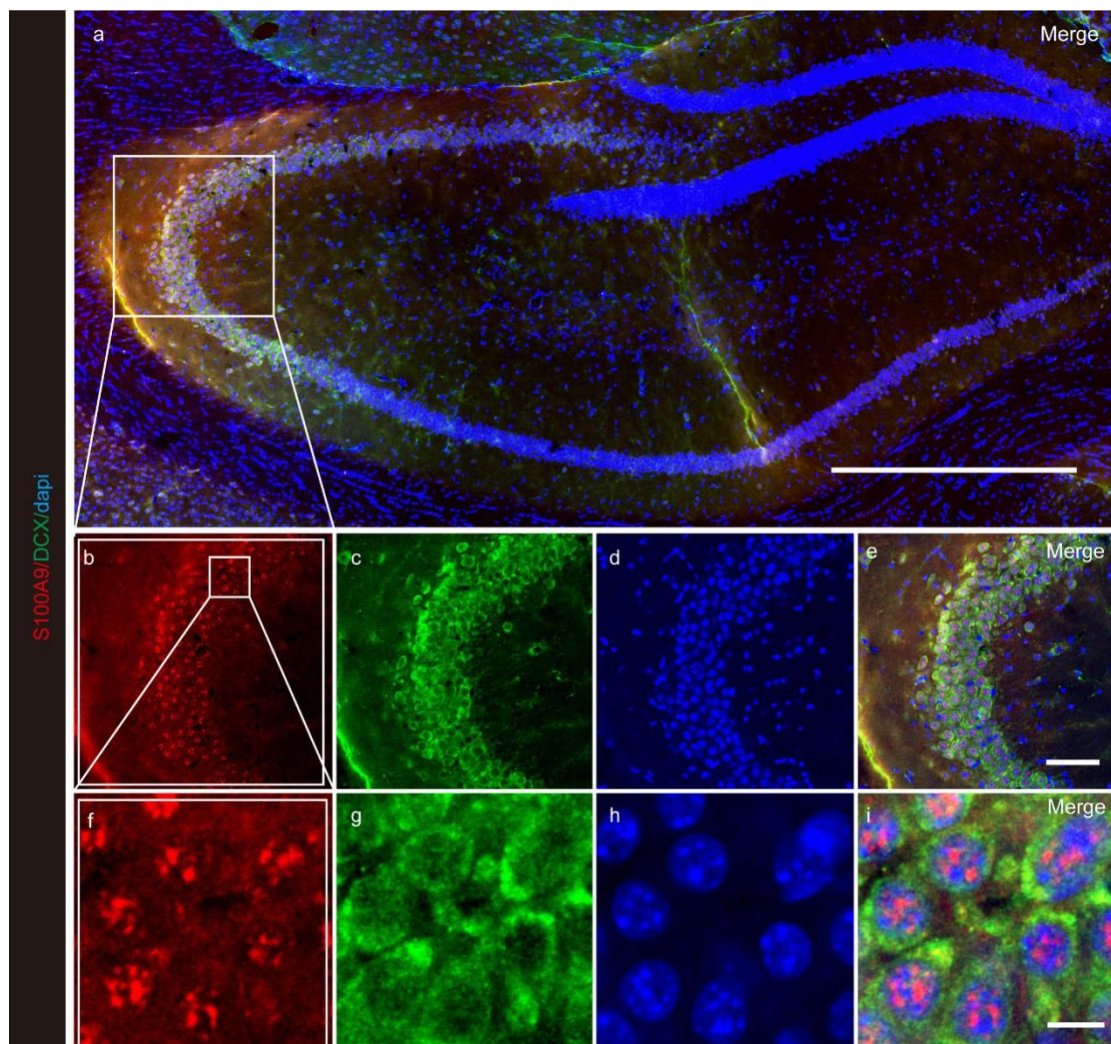

**Supplementary Figure 1** S100A9 and DCX<sup>+</sup> cells co-localization in the hippocampus. **a.** hippocampus large scan, Scale bars, 500  $\mu$ m. **b-e.** Partial enlargement of hippocampal CA3 area, Scale bars, 65  $\mu$ m. **f-i.** Show details, Scale bars, 10  $\mu$ m.

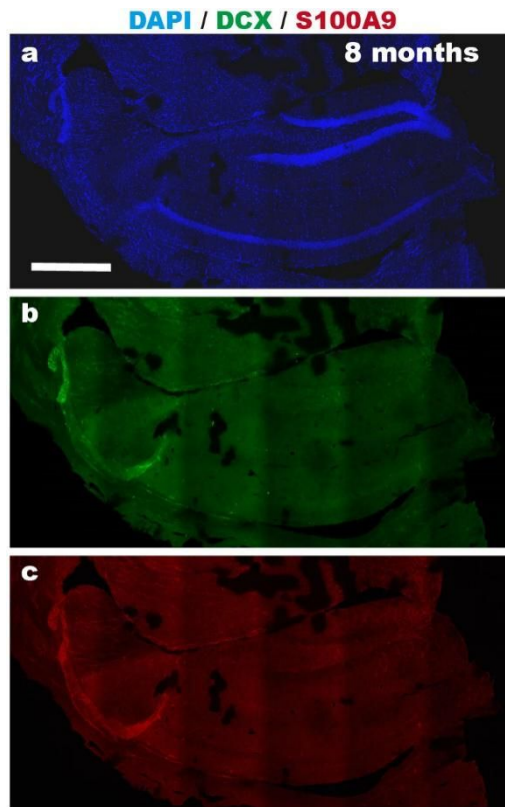

**Supplementary Figure 2:** Immunofluorescent staining of 8-month-old APP/PS1, mouse hippocampus with only the secondary antibodies, (a) DAPI, (b) DyLight 549 Donkey Anti-Rabbit IgG and (c) DyLight 488 Donkey Anti-Goat IgG. Scale bar denotes 500  $\mu\text{m}$ .

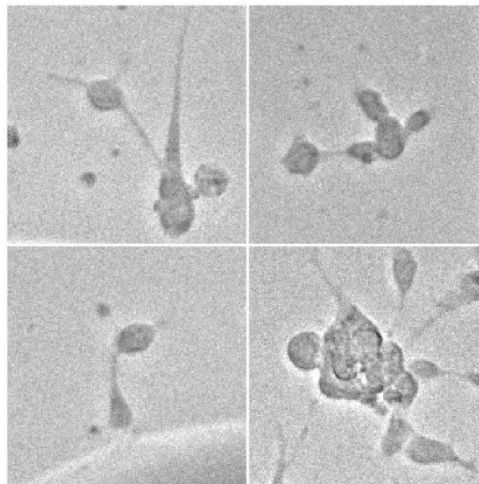

**Supplementary Figure 3:** Bright-field images of NSCs during sphere formation. It is demonstrated that the NSCs aggregation is directed by the axon.

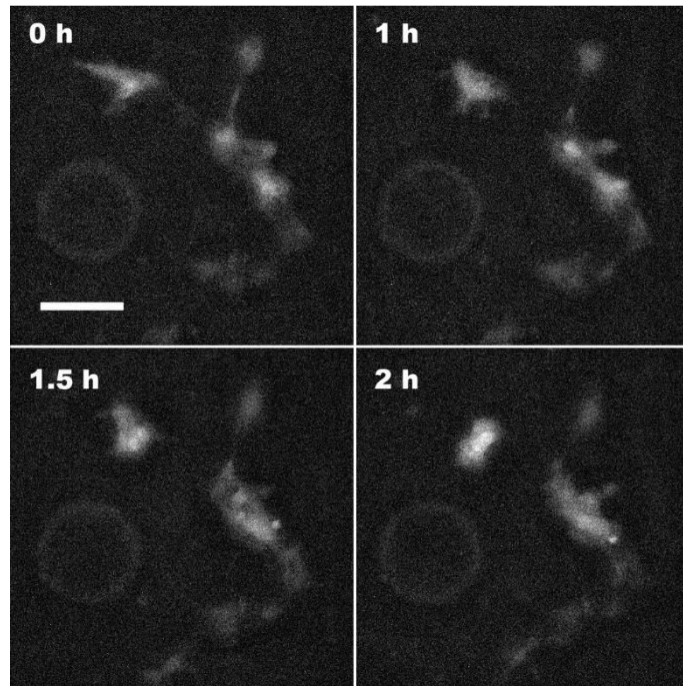

**Supplementary Figure 4:** Aggregation of NSCs transfected with the GFP-control vector does not bring obvious increase in the fluorescent level, excluding the effects of abnormal expression.

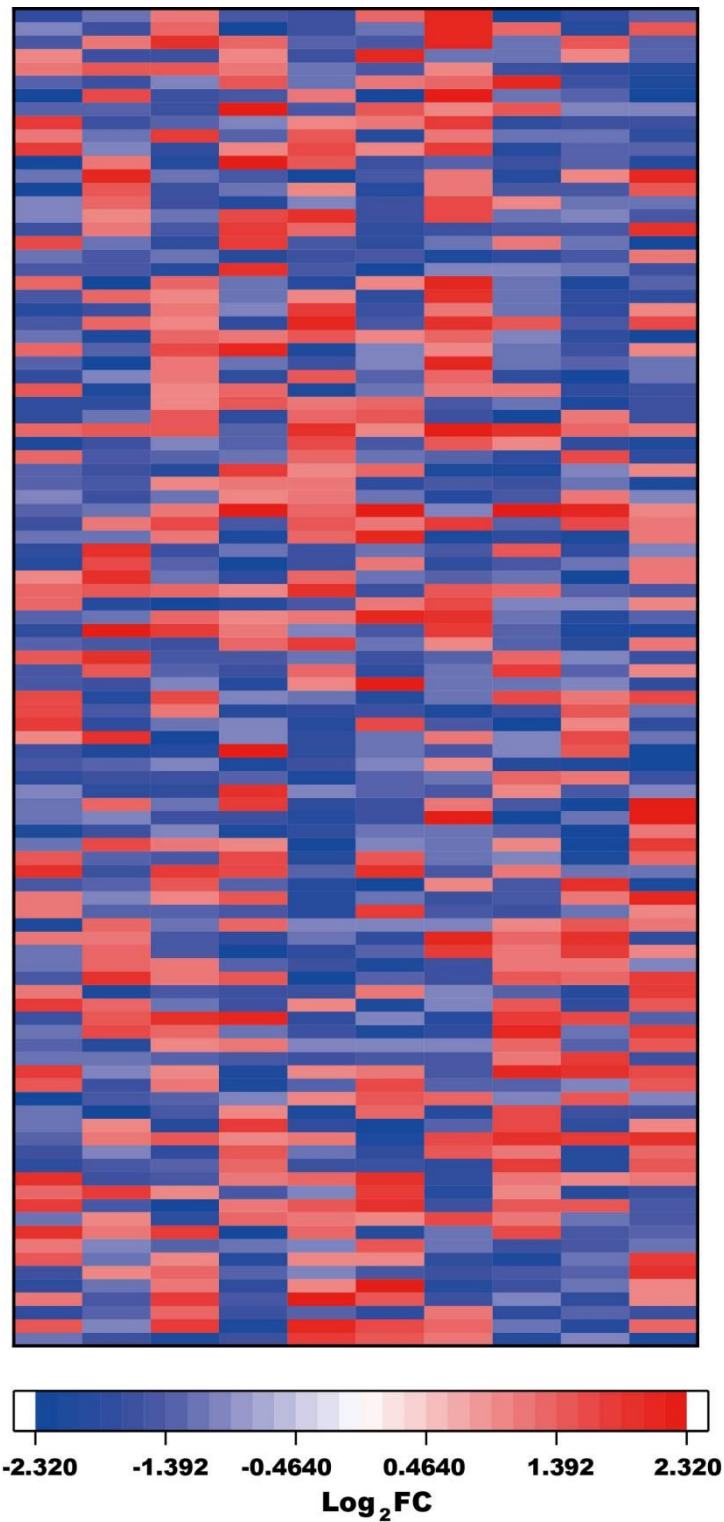

**Supplementary Figure 5** Gene expression level of NSCs upon stimulation by S100A9 is normalized to the values of control samples, which are maintained in the culture medium. It is demonstrated that addition of 10  $\mu\text{g/ml}$  S100A9 causes substantial amount of up- and down-regulated genes. The list of gene names is shown in Supplementary Table 1.
